# Supplementary material
Source: publisher site journal article supplement (https://www.spandidos-publications.com/108/downloadSupplementary)

**Figure S1.** Cell viability is not altered at 24 h by select stilbene compounds. MDA-MB-157, MDA-MB-231 and BT-549 cells were treated with stilbene compounds (10  $\mu$ M) or DMSO control and changes in cell viability were assessed after 24 h. Bars represent normalized mean (DMSO control set to 100)  $\pm$  SEM for biological triplicate experiments.

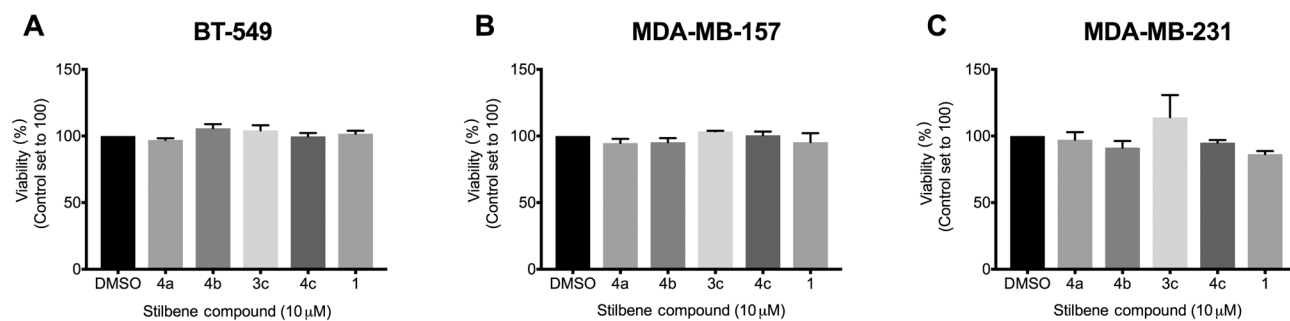

Supplement: Supplementary file 1 [file downloadSupplementary]
